# Supplementary material for: Core Needle Biopsy of Breast Cancer Tumors Increases Distant Metastases in a Mouse Model
Source: PubMed Central journal article supplement — Neoplasia. 2014 Nov 20;16(11):950–60. doi: 10.1016/j.neo.2014.09.004 (PMC4240917; doi:10.1016/j.neo.2014.09.004), 2014-11-20
Supplement: mmc1.pdf [file mmc1.pdf]

| <b>Primers</b>                        | <b>Forward</b>           | <b>Reverse</b>             |
|---------------------------------------|--------------------------|----------------------------|
| Neo (Neomycin Resistance gene)        | 5'TGAATGAACTGCAGGACG     | 5'ATACTTTCTCGGCAGGAGC      |
| S100A8                                | 5'CCGTCTTCAAGACATCGTTTGA | 5'GTAGAGGGGCATGGTGATTTCTT  |
| Ly-6G (Gr-1)                          | 5'TGGACTCTCACAGAAGCAAAG  | 5'GCAGAGGTCTTCCTTCCAACA    |
| CXCL2 (MIP-2)                         | 5'TCCAGAGCTTGAGTGTGACG   | 5'GCAAACTTTTTGACCGCCT      |
| CCL3 (MIP-1a)                         | 5'ATGAAGGTCTCCACCACTGC   | 5'GATGAATTGGCGTGGAATCT     |
| FOXP3                                 | 5'ATGCCCAACCCTAGGCCAGC   | 5'TCAAGGGCAGGGATTGGAGCC    |
| COX-2                                 | 5'AGAAGGAAATGGCTGCAGAA   | 5'GCTCGGCTTCCAGTATTGAG     |
| TGF- $\beta$                          | 5'GGACTCTCCACCTGCAAGAC   | 5'CTGGCGAGCCTTAGTTTGG      |
| SOX-4                                 | 5'ACAACGCGGAGAACTGAG     | 5'TCTGCGACCACACCATAAAGG    |
| Ezh2                                  | 5'TCCATGCAACACCCAACACAT  | 5'GCAGTAAGAGCAGCAGCAAAC    |
| SNAI2                                 | 5'CATCCTTGGGGCGTGTAAGT   | 5'ATGGGGGTCTGAAAGCTTGG     |
| ZEB2                                  | 5'TCCATGCAACACCCAACACAT  | 5'GCAGTAAGAGCAGCAGCAAAC    |
| CDH2 (N-Cadherin)                     | 5'GGCCTTCAAACACAGCCAC    | 5'TGGCTACAATGACGTCCACC     |
| IL-1 $\beta$                          | 5'GCCATCCTCTGTGACTCAT    | 5'AGGCCACAGGTATTTGTCTG     |
| TNF $\alpha$                          | 5' TGTTGCCTCCTCTTTTGCTT  | 5' TGGTCACCAAATCAGCGTTA    |
| IL-10                                 | 5' CCAGGGAGATCCTTTGATGA  | 5' AACTGGCCACAGTTTTCAGG    |
| MMP-9                                 | 5'TTCTCTGGACGTCAAATGTGG  | 5'CAAAGAAGGAGCCCTAGTTCAAGG |
| uPA (urokinase plasminogen activator) | 5'CGAATACTACAGGGAAGAC    | 5'GACATTTTCAGGTTCTTTGG     |
| GAPDH                                 | 5'GCGAGACCCCACTAACATCA   | 5'GGCGGAGATGATGACCCTTT     |
| $\beta$ -Actin                        | 5'GCTCCCCGGGCTGTATTC     | 5'CCTTCTGACCCATTCCCACC     |
