# Supplementary figures and images for: Core Needle Biopsy of Breast Cancer Tumors Increases Distant Metastases in a Mouse Model
Source: PubMed Central journal article supplement — Neoplasia. 2014 Nov 20;16(11):950–60. doi: 10.1016/j.neo.2014.09.004 (PMC4240917; doi:10.1016/j.neo.2014.09.004), 2014-11-20

**A**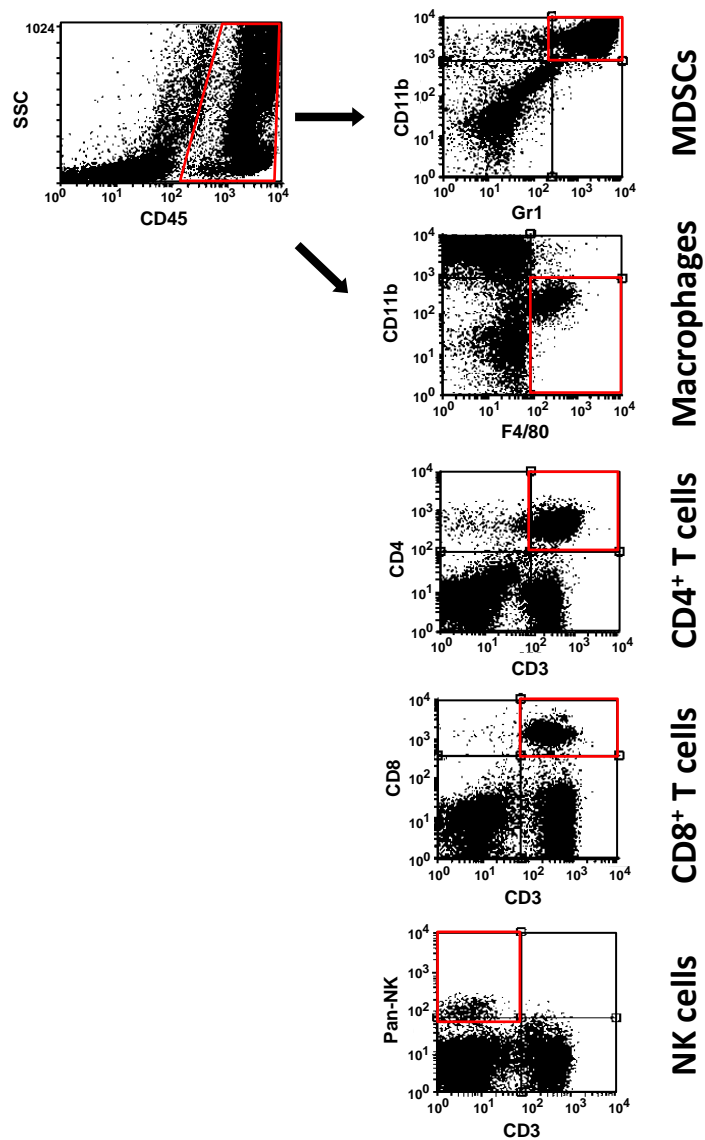**B****Lymph Node**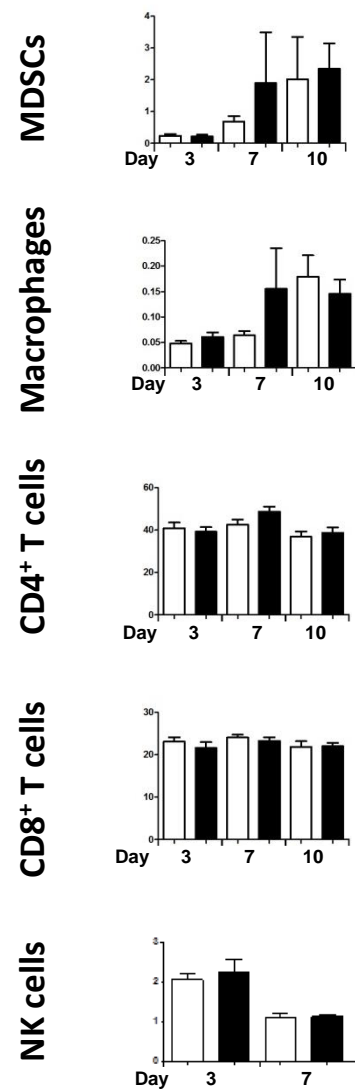

Supplement: mmc2.pdf [file mmc2.pdf]
